# Supplementary material for: Altered marginal zone and innate-like B cells in aged senescence-accelerated SAMP8 mice with defective IgG1 responses
Source: PubMed Central journal article supplement (PMC5596542; doi:10.1038/cddis.2017.351), 2017-08-17
Supplement: cddis2017351x4.pdf [file cddis2017351x4.pdf]

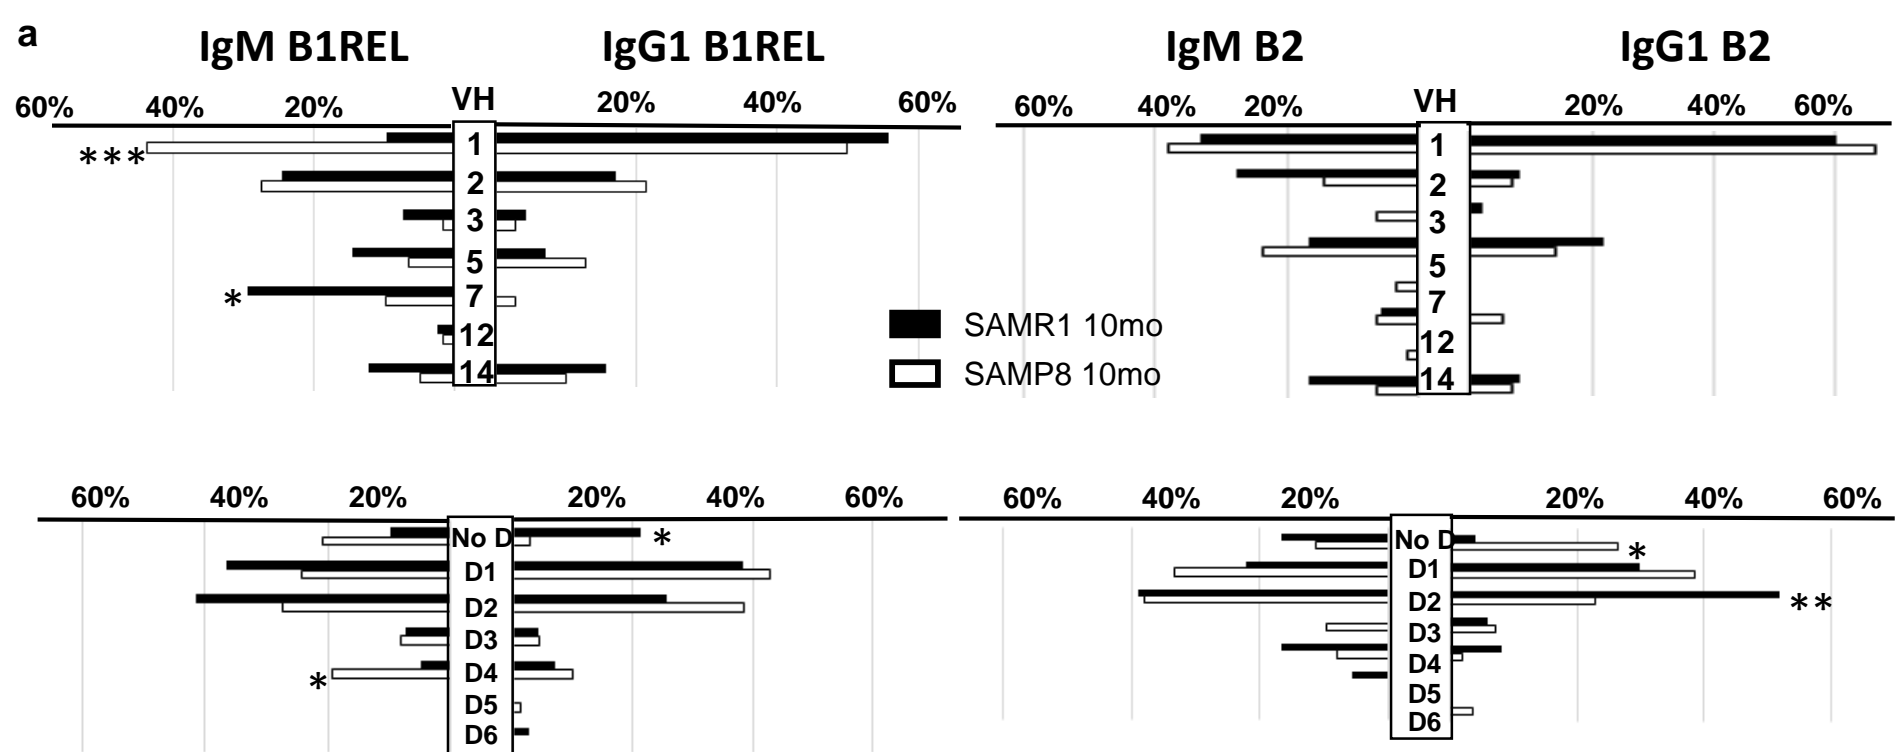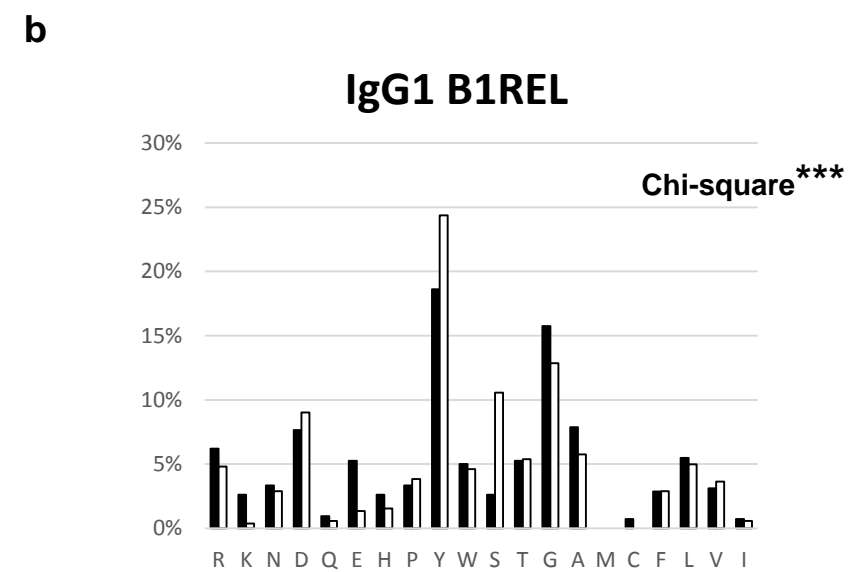

**c**

**IgG1 B1REL**

**IgG1 B2**

**Percentage unique sequences**

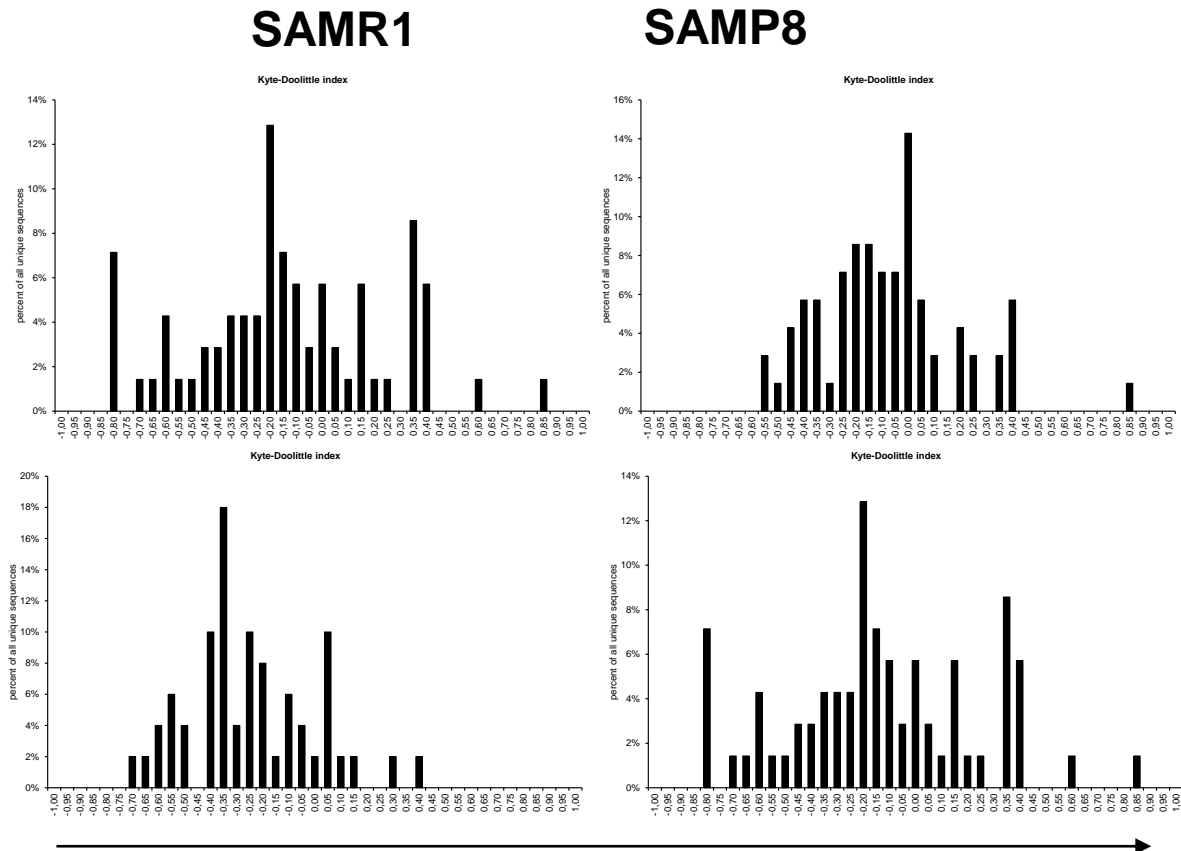

**Average CDR-H3 hydrophobicity (Kyte-Doolittle index)**

|       | Kyte-Doolittle index |       | Student's <i>t</i> -test |
|-------|----------------------|-------|--------------------------|
|       | SAMR1                | SAMP8 | R1/P8                    |
| B1REL | -0.16                | -0.10 | ***                      |
| B2    | -0.26                | -0.04 | ***                      |

**Figure S4: V<sub>H</sub>, D<sub>H</sub> rearrangements and AA usage of the sequences obtained from B1REL and B2 from aged SAMR1 10mo and SAMP8 10mo mice.** (a) V<sub>H</sub> and D<sub>H</sub> usage expressed as percentages of the total samples analysed. Statistical analyses were performed using the Chi-square test for contingency tables as indicated below the histograms: \* $p < 0.05$ , \*\* $p < 0.01$ . (b) Overall amino acid frequencies distribution in the CDR-H3 loop of the indicated samples. Amino acids are arranged by polarity from arginine (left) to isoleucine (right). Comparisons on the AA usage distribution between SAMR1 and SAMP8 in CD3-H3 loop of IgG1 sequences from the B1REL and the B2 cell populations were tested for statistical significance using the Chi-square test, significant differences between both groups were found (\*\*\*\* $p < 0.001$ ). (c) Average hydrophobicity of the CDR-H3 loop from the groups shown in the figure was calculated using the normalized Kyte-Doolittle index. Data were obtained from the IgAT software (*Eisenberg et al.*). Comparisons between groups were studied using the two-tailed Student's *t*-test.

Eisenberg, D. 1984. Three-dimensional structure of membrane and surface proteins. *Annu Rev Biochem* 53:595-623.
