# Supplementary material for: Altered marginal zone and innate-like B cells in aged senescence-accelerated SAMP8 mice with defective IgG1 responses
Source: PubMed Central journal article supplement (PMC5596542; doi:10.1038/cddis.2017.351), 2017-08-17
Supplement: cddis2017351x5.pdf [file cddis2017351x5.pdf]

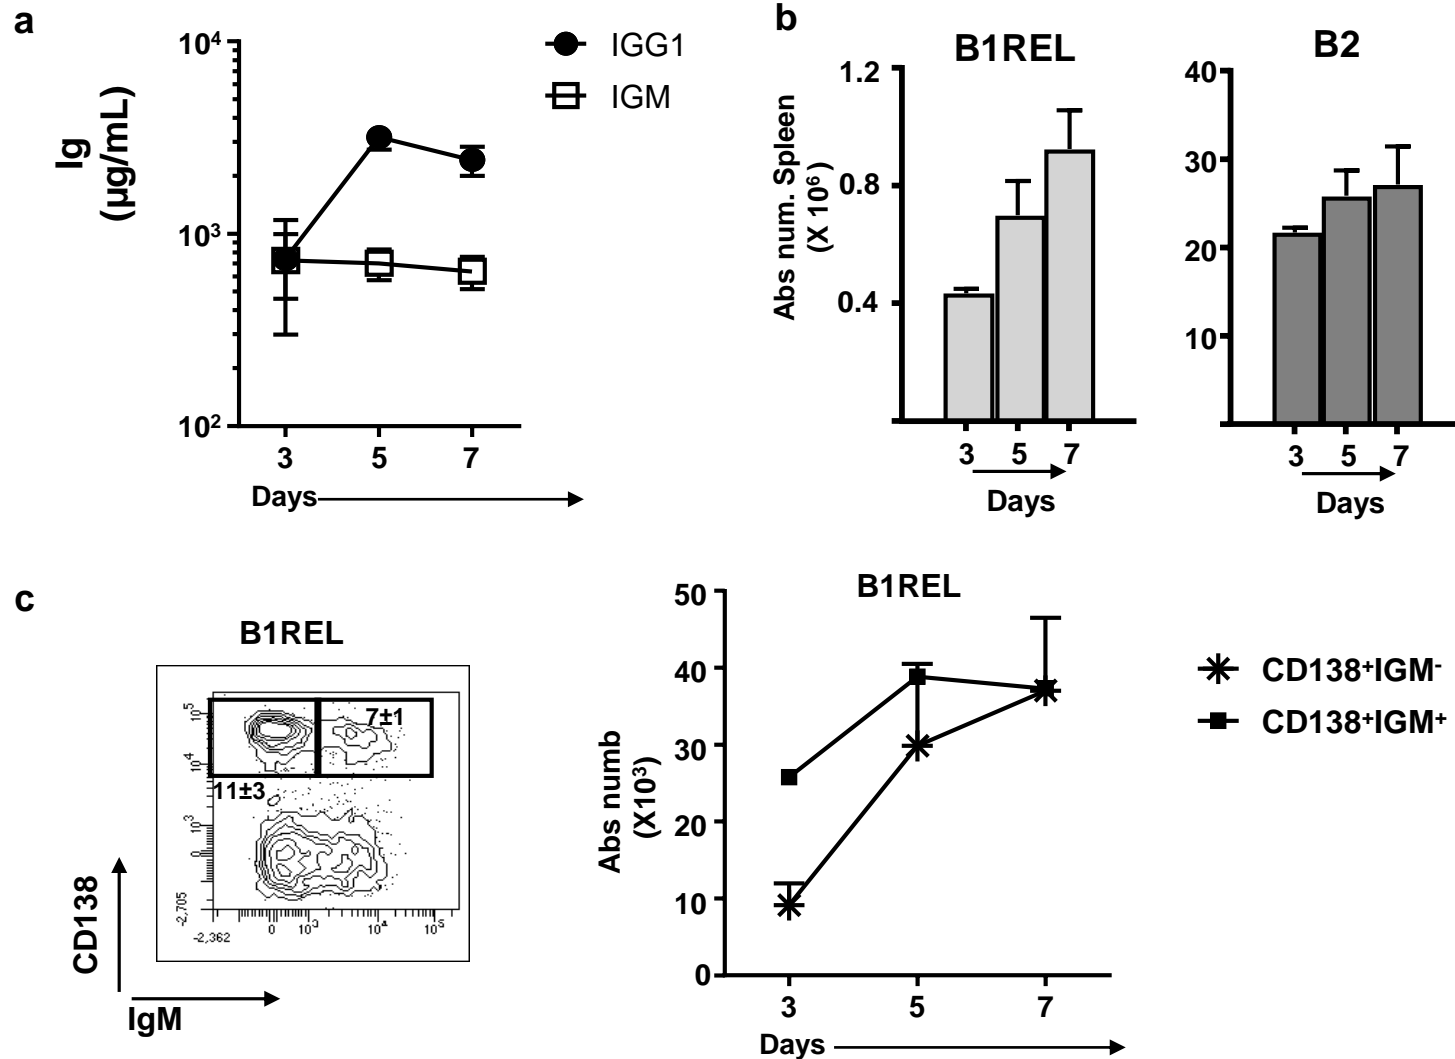

**Figure S5: In vivo stimulation of BALB/c 2-month-old with LPS.** Mice were injected i.p., with LPS as described in Materials and Methods. Sera and splenocytes were collected on days 3, 5 and 7 after immunization. (a) ELISA sera determination for IgM and IgG1. (b) Quantitation of B1REL cells (left graph) and B2 cells (right graph) as described in Fig. 1b. (c) B1REL quantitation of CD138<sup>+</sup>IgM<sup>+</sup> and CD138<sup>+</sup>IgM<sup>-</sup> cells (n = 3).
